# Supplementary material for: Depletion of central memory CD8+ T cells might impede the antitumor therapeutic effect of Mogamulizumab
Source: PubMed Central journal article supplement (PMC8671535; doi:10.1038/s41467-021-27574-0), 2021-12-14
Supplement: 41467_2021_27574_MOESM1_ESM.pdf [file 41467_2021_27574_MOESM1_ESM.pdf]

**Title: Depletion of Central Memory CD8<sup>+</sup> T Cells Might Impede the Antitumor Therapeutic Effect of Mogamulizumab**

**Authors:** Yuka Maeda<sup>1</sup>, Hisashi Wada<sup>2\*</sup>, Daisuke Sugiyama<sup>3</sup>, Takuro Saito<sup>4</sup>, Takuma Irie<sup>1</sup>, Kota Itahashi<sup>1</sup>, Kodai Minoura<sup>5</sup>, Susumu Suzuki<sup>6</sup>, Takashi Kojima<sup>7</sup>, Kazuhiro Kakimi<sup>8</sup>, Jun Nakajima<sup>9</sup>, Takeru Funakoshi<sup>10</sup>, Shinsuke Iida<sup>11</sup>, Mikio Oka<sup>12</sup>, Teppei Shimamura<sup>5</sup>, Toshihiko Doi<sup>7</sup>, Yuichiro Doki<sup>4</sup>, Eiichi Nakayama<sup>13</sup>, Ryuzo Ueda<sup>6\*</sup> and Hiroyoshi Nishikawa<sup>1,3\*</sup>

**Supplementary Information**

Supplementary Fig. 1: Clinical courses of patients with solid cancers treated with mogamulizumab.

Supplementary Fig. 2: The entire landscape of changes at pre- and post- mogamulizumab treatment.

Supplementary Fig. 3: The gating strategy for T cell assays.

Supplementary Fig. 4: Control of CCR4 expression by FoxP3 in CD4<sup>+</sup> T cells and ATLL cell line.

Supplementary Fig. 5: NK-cell exhaustion and CCR4 expression in T cell subsets are potentially associated with patient survival.

Supplementary Fig. 6: Central memory CD8<sup>+</sup> T cells and eTreg cells exhibit different sensitivity to mogamulizumab treatment.

Supplementary Table 1. Patient characteristics and clinical responses who were examined with CyTOF.

Supplementary Table 2. Antibodies and tetramers used in the CyTOF analyses.

Supplementary Table 3. Antibodies and tetramers used in the flow cytometry analyses.

Supplementary methods

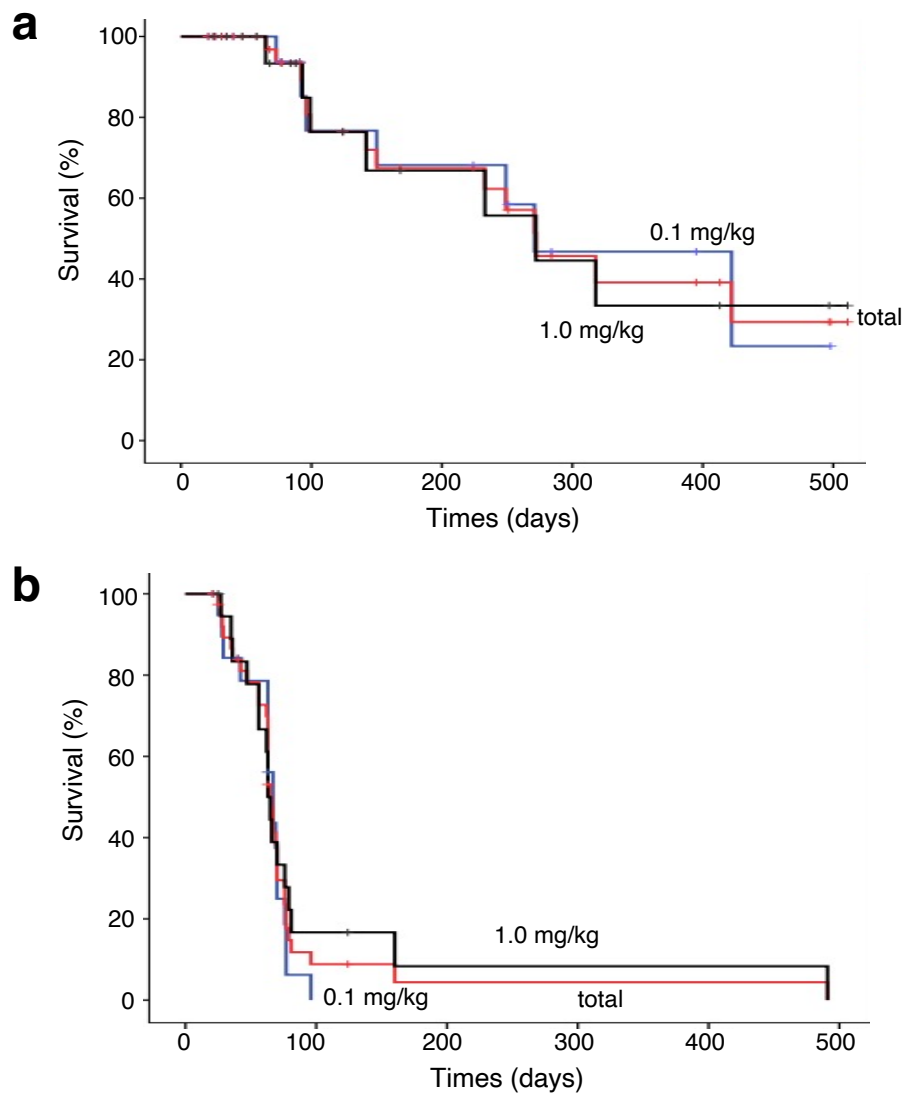

**Supplementary Fig. 1: Clinical courses of patients with solid cancers treated with mogamulizumab.**

**a, b.** Kaplan-Meier curves of OS (**a**) and PFS (**b**) for 39 CCR4-negative solid cancer patients (11 esophageal cancer, 12 lung cancer, 6 malignant melanoma, 5 gastric cancer and 5 ovarian cancer patients) who were treated with mogamulizumab (0.1 or 1.0 mg/kg). Green lines, total patients; red line, patients who received 1.0 mg/kg mogamulizumab; blue lines, patients who received 0.1 mg/kg mogamulizumab. Source data are provided as a Source Data file.

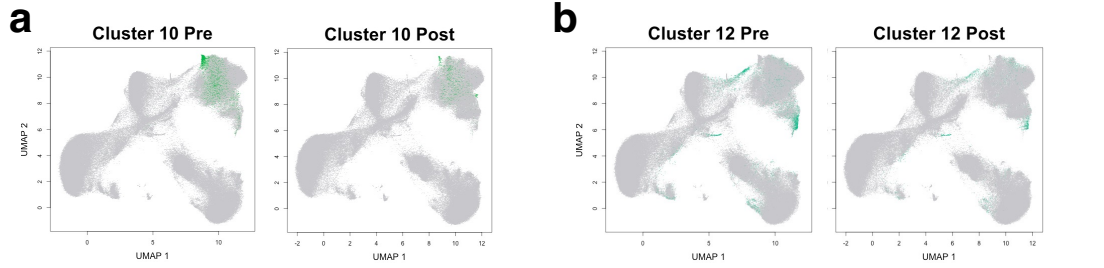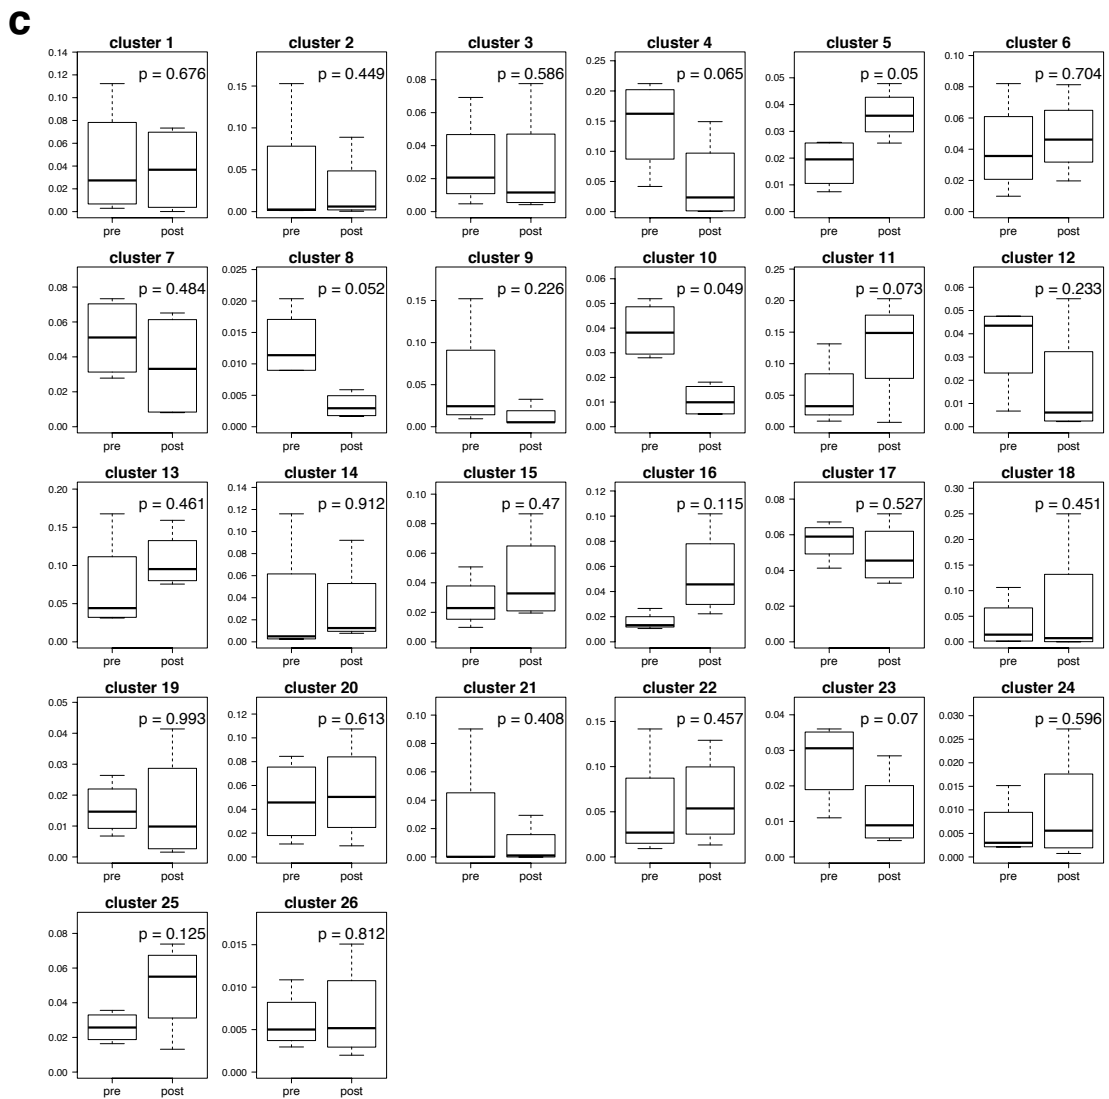

**Supplementary Fig. 2: The entire landscape of changes at pre- and post-mogamulizumab treatment.**

**a, b.** UMAP projection with green color indicating cells assigned to cluster 10 (Treg cells) (**a**) and cells assigned to cluster 12, which comprised the CD8<sup>+</sup> T cell population in the mixed population of CD4<sup>+</sup> and CD8<sup>+</sup> T cells (**b**). **c.** Boxplot of pre- and post-treatment proportions of all clusters (clusters 1,  $p = 0.676$ ; 2,  $p = 0.449$ ; 3,  $p = 0.586$ ; 4,  $p = 0.065$ ; 5,  $p = 0.05$ ; 6,  $p = 0.704$ ; 7,  $p = 0.484$ ; 8,  $p = 0.052$ ; 9,  $p = 0.052$ ; 10,  $*p = 0.049$ ; 11,  $p = 0.071$ ; 12,  $p = 0.233$ ; 13,  $p = 0.461$ ; 14,  $p = 0.912$ ; 15,  $p = 0.47$ ; 16,  $p = 0.115$ ; 17,  $p = 0.527$ ; 18,  $p = 0.451$ ; 19,  $p = 0.993$ ; 20,  $p = 0.613$ ; 21,  $p = 0.408$ ; 22,  $p = 0.457$ ; 23,  $p = 0.07$ ; 24,  $p = 0.596$ ; 25,  $p = 0.125$ ; 26,  $p = 0.812$ ) detected by CYBERTRACK2.0 in CyTOF analysis using PBMCs (n=4). The center line indicates the median, and the box limits indicate the 1st and 3rd quartiles. Whiskers extend to the 1.5x interquartile range. Two-sided paired Student's t-test was used for the comparison of changes at pre- and post-mogamulizumab treatment. Source data are provided as a Source Data file.

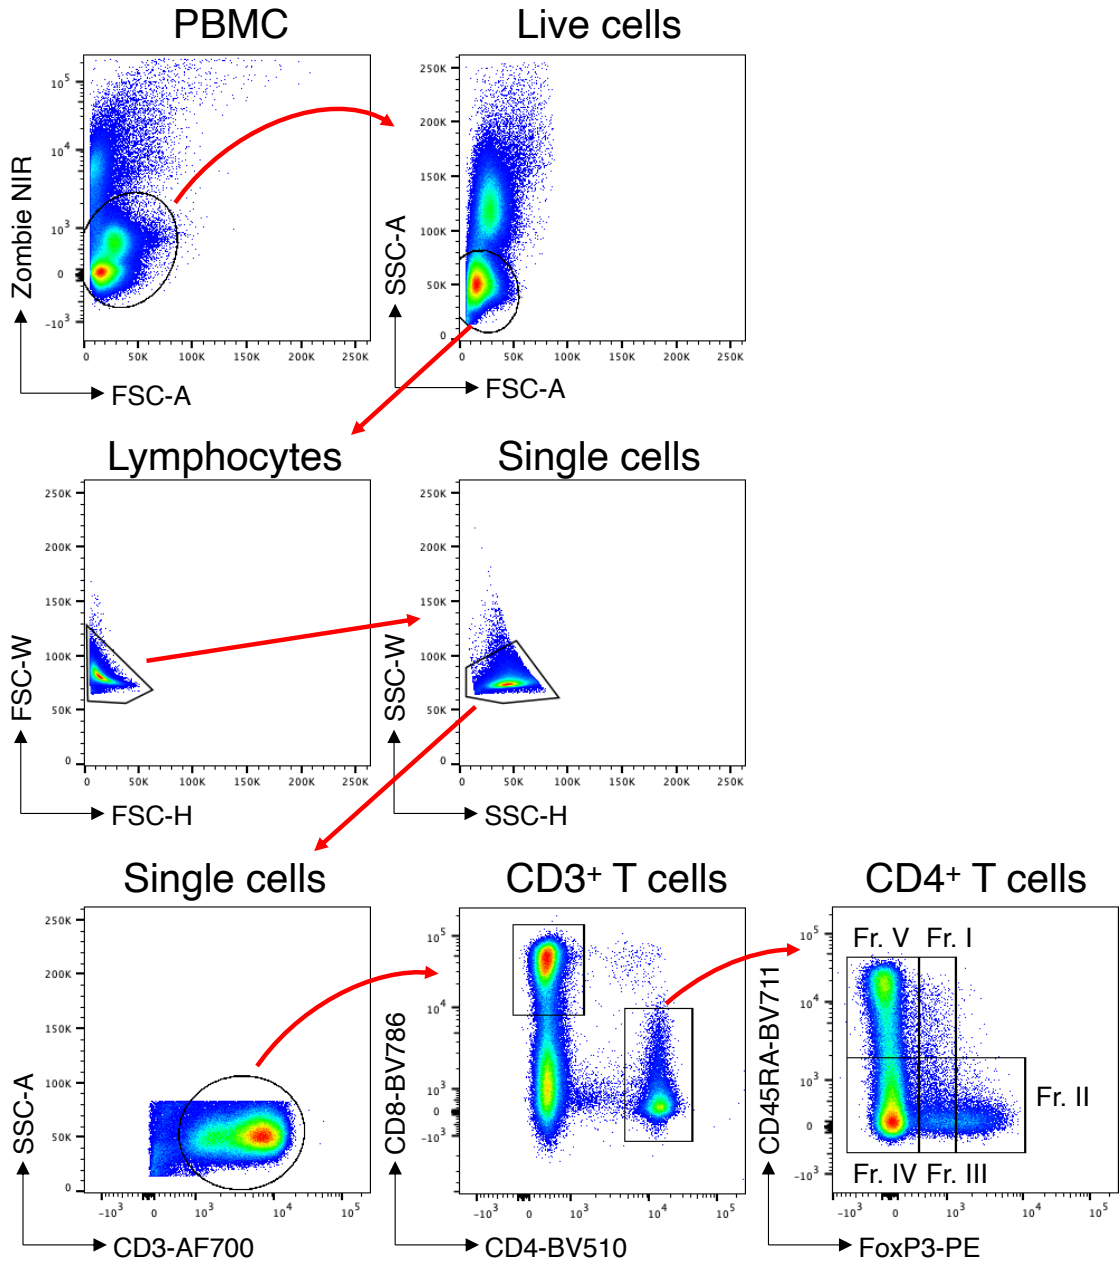

**Supplementary Fig. 3: The gating strategy for T cell assays.**

The live cells were identified as gating live/dead marker negative cells, and live lymphocytes were defined by gating FSC-A vs. SSC-A. Singlets were identified by exclusion of doublets using an FSC-H vs. FSC-W plot and SSC-H vs. SSC-W plot. Then, gates were set on CD3<sup>+</sup> cells (T cells) and then CD4<sup>+</sup>CD8<sup>-</sup> T cells and CD4<sup>-</sup>CD8<sup>+</sup> T cells. CD4<sup>+</sup> T cells were further separated based on the expression of CD45RA and FoxP3 to identify each CD4<sup>+</sup> T cell subpopulation.

**a**

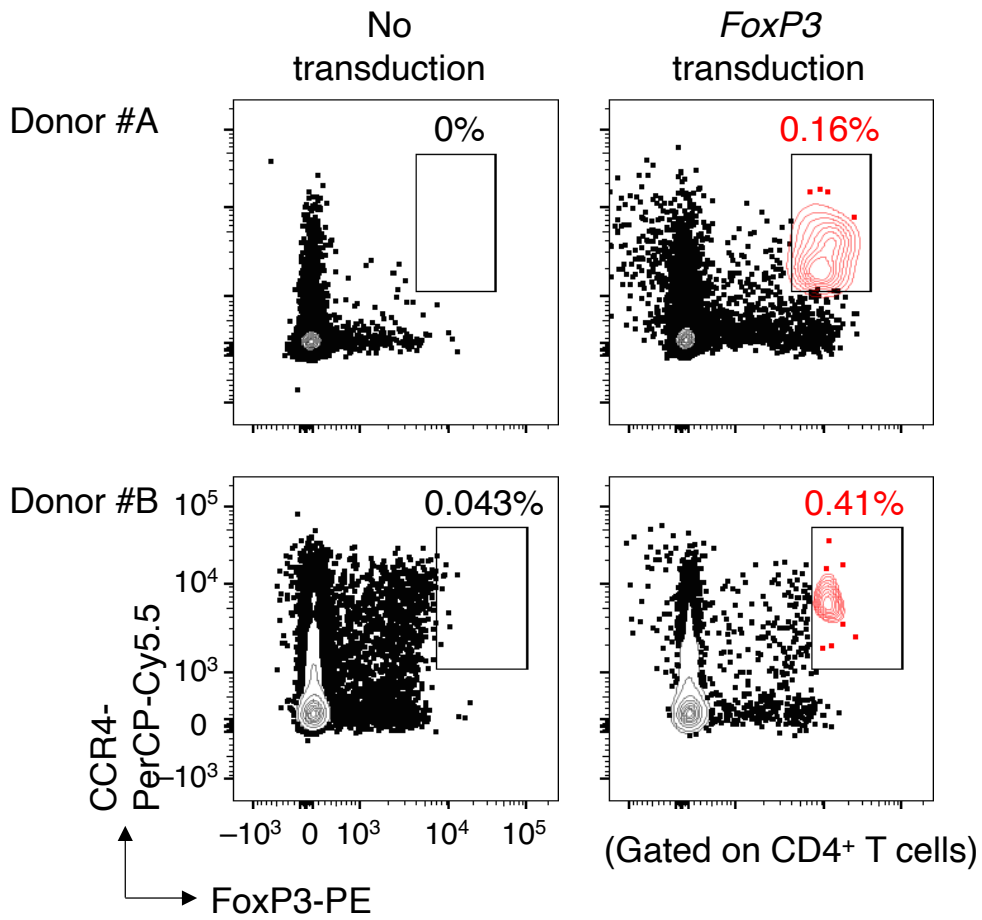

**b**

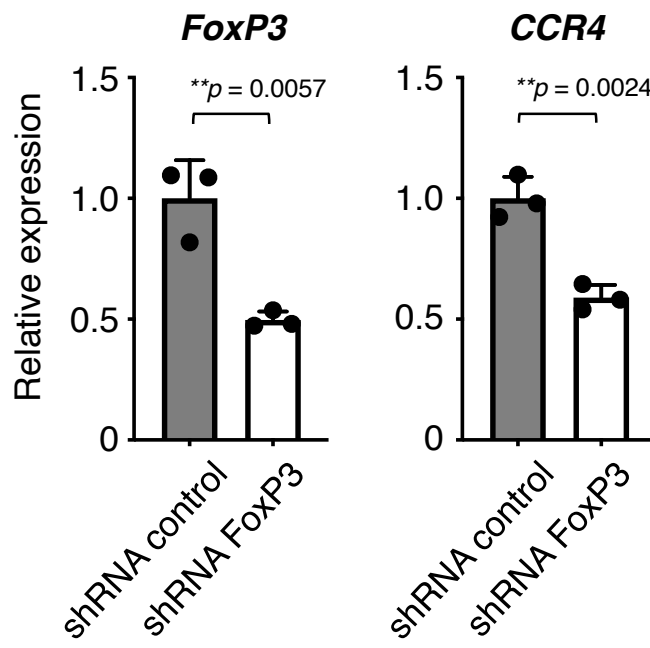

**Supplementary Fig. 4: Control of CCR4 expression by FoxP3 in CD4<sup>+</sup> T cells and ATLL cell line.**

**a.** Unstimulated CD4<sup>+</sup> T cells from PBMCs of healthy individuals (n = 2) were transduced with *FoxP3* gene and were cultured with IL-2 (30 IU/mL) for three days. CCR4 expression was examined with flow cytometry. Red dots, FoxP3<sup>high</sup>CCR4<sup>+</sup> cells; black dots, CD4<sup>+</sup> T cells. **b.** Knockdown of intracellular *FoxP3* in MJ, a FoxP3-expressing ATLL cell line, mediated by shRNAs was performed. Gene expression of *CCR4* (\*\**p* = 0.0057) and *FoxP3* (\*\**p* = 0.0024) in MJ cell lines was examined with real time-PCR. Error bars represent the standard deviation of triplicates. **b**, two-sided unpaired Student's t-test was used. The data represent the mean ± SD. \*\**p* < 0.001. Source data are provided as a Source Data file.



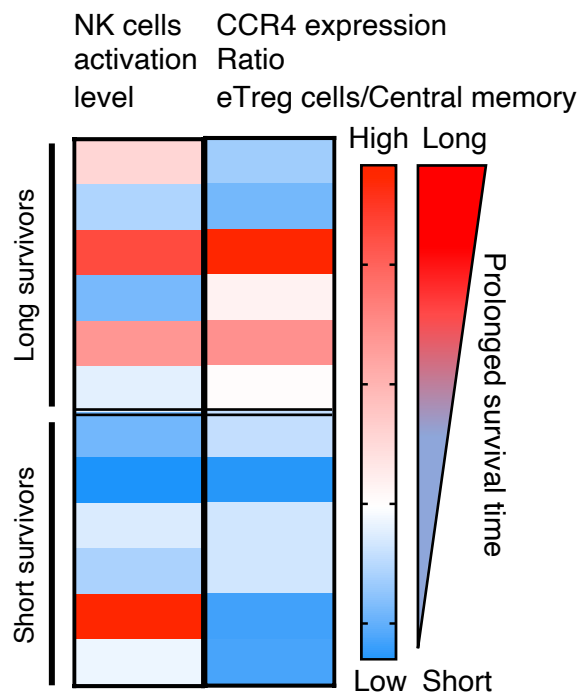

**Supplementary Fig. 5: NK-cell exhaustion and CCR4 expression in T cell subsets are potentially associated with patient survival.**

Heatmap of the frequency of exhausted NK cells and the ratios of CCR4 expression levels (mean fluorescence intensity: MFI) in eTreg cells to central memory CD8<sup>+</sup> T cells (Central memory). Source data are provided as a Source Data file.

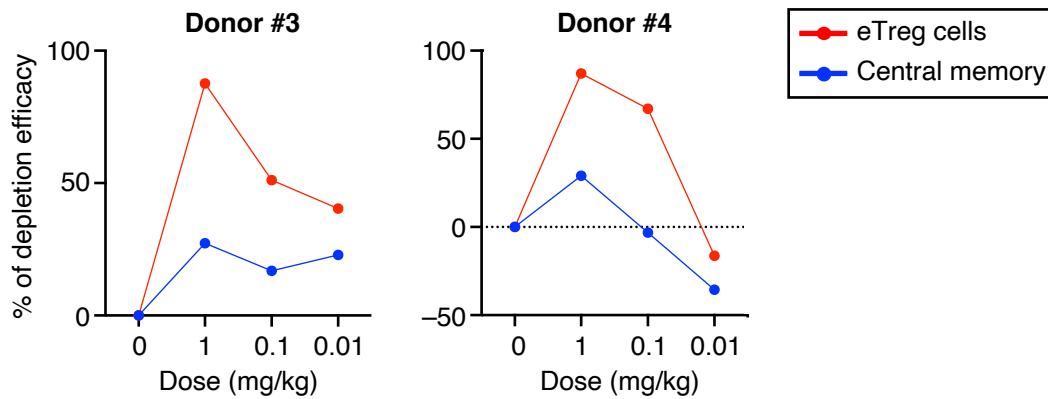

**Supplementary Fig. 6: Central memory CD8<sup>+</sup> T cells and eTreg cells exhibit different sensitivity to mogamulizumab treatment.**

NSG mice were administered with the indicated dose of mogamulizumab at one day after transferring PBMCs ( $1 \times 10^7$  cells / mouse) and spleen cells were collected from the mouse at three days after transferring PBMCs to examine with flow cytometry. The reduction of central memory CD8<sup>+</sup> T cells (Central memory) and eTreg cells was examined. Source data are provided as a Source Data file.

**Supplementary Table 1. Patient characteristics and clinical responses who were examined with CyTOF.**

|                          | OUH-04 | OUH-05    | OUH-10  | OUH-16 |
|--------------------------|--------|-----------|---------|--------|
| sex                      | Female | Male      | Male    | Female |
| age (year-old)           | 65     | 64        | 70      | 73     |
| BMI (kg/m <sup>2</sup> ) | 25.7   | 17.6      | 19.7    | 25.8   |
| cancer organ             | Ovary  | Esophagus | Stomach | Ovary  |
| clinical response        | PD     | PR        | PD      | PD     |
| PFS (days) (RECIST)      | 66     | 491       | 70      | 76     |
| OS (days)                | 413    | 511       | 271     | 84     |

**Supplementary Table 2. Antibodies and tetramers used in the CyTOF analyses.**

| <b>Antibodies used for CyTOF</b> |               |                |                    |
|----------------------------------|---------------|----------------|--------------------|
| <b>Molecule</b>                  | <b>Clone</b>  | <b>Company</b> | <b>Conjugation</b> |
| EOMES                            | WD1928        | Fluidigm       | 141Pr              |
| CD40                             | 5C3           | Fluidigm       | 142Nd              |
| CD45RA                           | HI100         | Fluidigm       | 143Nd              |
| CD8a                             | RPA-T8        | Fluidigm       | 146Nd              |
| CD11c                            | Bu15          | Fluidigm       | 147Sm              |
| CD14                             | RMO52         | Fluidigm       | 148Nd              |
| pLck [T505]                      | 4/LCK-Y505    | Fluidigm       | 149Sm              |
| CD134 (OX40)                     | ACT35         | Fluidigm       | 150Nd              |
| CD107a (LAMP1)                   | H4A3          | Fluidigm       | 151Eu              |
| CD194 (CCR4)                     | 205410        | Fluidigm       | 153Eu              |
| CD3                              | UCHT1         | Fluidigm       | 154Sm              |
| CD279 (PD-1)                     | EH12.2H7      | Fluidigm       | 155Gd              |
| CD86                             | IT2.2         | Fluidigm       | 156Gd              |
| pStat3 [Y705]                    | 4             | Fluidigm       | 158Gd              |
| FoxP3                            | 236A/E7       | Fluidigm       | 159Tb              |
| Tbet                             | 4B10          | Fluidigm       | 160Gd              |
| CD152 (CTLA-4)                   | 14D3          | Fluidigm       | 161Dy              |
| CD80 (B7-1)                      | 2D10.4        | Fluidigm       | 162Dy              |
| CD183 (CXCR3)                    | G025H7        | Fluidigm       | 163Dy              |
| CD185 (CXCR5)                    | 51505         | Fluidigm       | 164Dy              |
| CD223 (LAG3)                     | 874501        | Fluidigm       | 165Ho              |
| pNF-kB p65 [S529]                | K10-895.12.50 | Fluidigm       | 166Er              |
| CD197 (CCR7)                     | G043H7        | Fluidigm       | 167Er              |
| CD154 (CD40L)                    | 24-31         | Fluidigm       | 168Er              |
| CD25 (IL-2R)                     | 2A3           | Fluidigm       | 169Tm              |
| CCR8                             | L263G8        | Fluidigm       | 170Yb              |
| CD20                             | 2H7           | Fluidigm       | 171Yb              |
| pS6 [S235/S236]                  | N7-548        | Fluidigm       | 172Yb              |
| CD274 (PD-L1)                    | 29E.2A3       | Fluidigm       | 175Lu              |
| CD4                              | RPA-T4        | Fluidigm       | 176Yb              |

**Supplementary Table 3. Antibodies and tetramers used in the flow cytometry analyses.**

| <b>Antibodies used for flow cytometry</b> |              |                |                    |
|-------------------------------------------|--------------|----------------|--------------------|
| <b>Molecule</b>                           | <b>Clone</b> | <b>Company</b> | <b>Conjugation</b> |
| Human CD3                                 | UCHT1        | BD Biosciences | AF-700             |
| Human CD4                                 | SK3          | BD Biosciences | BV510              |
| Human CD8                                 | RPA-T8       | BD Biosciences | BV786              |
| Human CCR4                                | 1G1          | BD Biosciences | PerCP-Cy5.5        |
| Human CD45RA                              | HI100        | BioLegend      | BV711<br>AF-488    |
| Human PD-1                                | MIH4         | BD Biosciences | BV421              |
| Human FoxP3                               | 236A/E7      | eBioscience    | PE                 |
| Human CTLA-4                              | BNI3         | BD Biosciences | APC                |
| Human LAG3                                | 17B4         | Enzo           | FITC               |
| Human CCR7                                | 150503       | BD Biosciences | PE-CF594           |
| Zombie NIR                                |              | BioLegend      | NIR                |

## Supplementary methods

### Lentivirus transduction to primary human CD4<sup>+</sup> T cells

Human *FoxP3* gene were inserted into pLVSIN-EF1 $\alpha$ -Pur vector (Takara Bio, Shiga, Japan). In the lentiviral vector, *FoxP3*-pLVSIN-EF1 $\alpha$ -Pur, psPAX2 (Addgene plasmid # 12260) and pMD2.G (Addgene plasmid # 12259) were combined at a ratio of 2:1:1, respectively, in Opti-MEM (Thermo Fisher Scientific, Waltham, MA). The DNA mixture was incubated with PEI-MAX (Polysciences, Inc, Warrington, PA) at a ratio of 1:3 for 15 minutes at room temperature. The complex was added to the Lenti-X 293T cell line. The culture supernatant was collected after 24 and 48 hour incubation and was passed through a 0.45  $\mu$ m pore PVDF Millex-HV filter (Millipore, Billerica, MA). Concentrated lentivirus through centrifugation at 6000g overnight was added to the culture of primary human CD4<sup>+</sup> T cells, which were purified from PBMCs of healthy donors with a CD4<sup>+</sup> T Cell Isolation Kit (Miltenyi Biotec, Bergisch Gladbach, Germany). The transduced CD4<sup>+</sup> T cells were cultured with IL-2 (30 IU/mL) for 3 days, and were examined with flow cytometry.

### Lentivirus transduction to ATLL cell line

*FoxP3* knockdown in MJ, a FoxP3-expressing ATLL cell line, was performed with lentiviral transduction of FoxP3-shRNA vectors purchased from Vectorbuilder (VB900097-4153eup). Transduced cells were selected with puromycin at a concentration of 5  $\mu$ g/ml for further analyses. MJ cells expressing a scrambled control shRNA were used for control (VB010000-0009mxc).

### Real time-PCR

RNA was extracted from MJ cells transfected with control-shRNA or FoxP3-shRNA using a RNeasy Mini Kit (QIAGEN). cDNA was generated with a SuperScript IV VILO (Thermo Fisher Scientific), and RT-PCR was performed with PowerUp SYBR Green Master Mix (Thermo Fisher Scientific) using a QuantStudio 7 Flex Real-Time PCR System (Thermo Fisher Scientific). The gene expression was normalized with GAPDH as an endogenous control. The following PCR primers were used: GAPDH forward: GCACCGTCAAGGCTGAGAAC; GAPDH reverse: ATGGTGGTGAAGACGCCAGT; CCR4 forward: TGCTCTGCCAATACTGTGGG; ATGATCCATGGTGGACTGCG.

### *In vivo* humanized mouse model

NSG (NOD.Cg-*Prkdc*<sup>scid</sup> *Il2rg*<sup>tm1Wjl</sup>/SzJ; 6-week-old females) mice were purchased from Charles River Laboratories (Yokohama, Japan). The mice were 6-10 week old female and housed in cages under specific pathogen free conditions, provided with sterilized standard food, given sterilized drinking water, and on a 12:12 light/dark cycle with lights on at 9:00 am. Temperature was kept at 22°C (20-26°C) and humidity at 45% (40-60%). Transferred with human PBMCs ( $1 \times 10^7$  cells / mouse) through tail vein. These mice were administered with the indicated dose of mogamulizumab at one day after transferring PBMCs. Spleens were collected from the mouse at three days after transferring PBMCs, and single-cell suspensions were prepared. The cells were analyzed with an LSRFortessa instrument (BD Biosciences) and FlowJo software (BD Biosciences). All mice were maintained in a specific pathogen-free facility at Nagoya University Graduate School of Medicine. Animal care and all experiments were conducted according to the guidelines of the Animal Committee of Nagoya University after approval by the Ethics Review Committee for Animal Experimentation of Nagoya University.
